1 **Title: Characterization of Cyanobacterial Communities in Lakes Requires**

2 **Consideration of Diurnal and Spatial Variation**

3

4 **Authors:** Ellen S. Cameron<sup>a</sup>, Monica B. Emelko<sup>b</sup>, Kirsten M. Müller<sup>a,\*</sup>

5 <sup>a</sup> Department of Biology, University of Waterloo, 200 University Ave. W, Waterloo,

6 Ontario, Canada, N2L 3G1

7 <sup>b</sup> Department of Civil & Environmental Engineering, University of Waterloo, 200

8 University Ave. W, Waterloo, Ontario, Canada, N2L 3G1

9

10 **E-mail address: [kirsten.muller@uwaterloo.ca](mailto:kirsten.muller@uwaterloo.ca) (K.M. Müller).**

11 **Abstract**

12 Continental-scale increases in aquatic system eutrophication are linked with increased  
13 cyanobacteria threats to recreational water use and drinking water resources globally.  
14 While some guidance regarding monitoring is available, it is largely reactive and  
15 insufficient for proactive risk mitigation and management, which necessarily requires an  
16 understanding of the composition and dynamics of cyanobacterial communities in the  
17 aquatic system. Their distribution is impacted by several factors, including water column  
18 mixing and buoyancy regulation responses to light availability that create oscillatory  
19 diurnal migration patterns within the water column, creating challenges in the ability to  
20 accurately describe and quantify cyanobacterial densities. These dynamic fluctuations are  
21 not typically reflected in monitoring protocols, which frequently focus on surface depths  
22 and either ignore sampling time or recommend large midday timeframes (e.g., 10AM-  
23 3PM), thereby precluding accurate characterization of cyanobacterial communities.  
24 While diurnal vertical migration of cyanobacteria has been reported in marine and  
25 eutrophic freshwater systems, reports in oligotrophic freshwater lakes are scant and  
26 characterization have focused on individual 24-hour periods neglecting to consider day-  
27 to-day variability. These dynamics must be better understood and reflected in water  
28 quality monitoring guidance to advance drinking water risk management and source  
29 water protection approaches. To evaluate the impact of diurnal migrations and water  
30 column stratification on cyanobacterial abundance, communities were characterized using  
31 a multi-time point sampling series across a 48-hour period in a shallow well-mixed lake  
32 interconnected to a thermally stratified lake in the Turkey Lakes Watershed (Ontario,  
33 Canada). Amplicon sequencing of the V4 region in the 16S rRNA gene was performed to

34 characterize microbial community composition. Cyanobacteria were significantly  
35 represented in the microbial community in the midday and afternoon sampling times in  
36 the thermally stratified lake, but not in the well-mixed lake. Although the lakes in this  
37 study are interconnected, the cyanobacterial communities within them exhibited unique  
38 composition and distribution trends, thereby underscoring the importance of developing  
39 detailed sampling guidance to maximize the utility of cyanobacteria monitoring and  
40 better characterize and mitigate risk.

#### 41 **Keywords**

42 Amplicon sequencing, diel cycles, vertical migration, buoyancy, algae, eutrophication

#### 43 **Highlights**

- 44     ▪ Water column stability impacts diurnal migrations of cyanobacteria
- 45     ▪ Gas vacuolate taxa are more abundant at surface, but also present at depth
- 46     ▪ Rain events can impact cyanobacteria distribution and impact detection
- 47     ▪ Cyanobacteria distribution can vary significantly between interconnected lakes
- 48     ▪ Cyanobacteria monitoring for risk management should incorporate time and depth

## 49 **1. Introduction**

50 Cyanobacteria are recognized as a threat to surface water quality because they can  
51 form dense blooms and produce secondary metabolites including taste and odor  
52 compounds (e.g., geosmin, 2-methyl isoborneol) and potent cyanotoxins (Harke et al.,  
53 2016; Huisman et al., 2018; Paerl, 2014; Vu et al., 2020). As a result of anthropogenic  
54 activities, cyanobacterial bloom frequency and intensity have been increasing (Huisman  
55 et al., 2018); climate change-exacerbated landscape disturbances (e.g., wildfires) further  
56 promote their proliferation (Emelko et al., 2016; Silins et al., 2014). Accordingly, as  
57 incidences of toxic blooms continue to increase (Huisman et al., 2018), water quality  
58 monitoring programs are needed to accurately characterize cyanobacterial communities in  
59 critical water supplies such as those relied upon for the provision of drinking water. The  
60 success of these monitoring programs relies on the ability to accurately characterize  
61 cyanobacterial communities and their distributions through incorporation of a  
62 comprehensive understanding on the adaptation of these organisms to environmental  
63 stress including the diurnal migrations in response to light and nutrient gradients  
64 (Huisman et al., 2018; Paerl, 2014).

65 The diurnal migration of cyanobacterial populations is driven by cellular  
66 characteristics (Naselli-Flores et al., 2021) and water column stability (Walsby et al.,  
67 1997), as summarized in Table 1. Diurnal migration rates (e.g., flotation and/or sinking  
68 rates) and vertical distribution of populations may be distinctive to individual taxa arising  
69 from characteristic differences in cell sizes or the presence of specialized cellular  
70 structures impacting cellular density (Naselli-Flores et al., 2021; Reynolds et al., 1987).  
71 However, these characteristic distributions are further impacted by water column stability

72 (Walsby et al., 1997) with the potential for oscillatory diurnal variation in the distribution  
73 of cyanobacterial populations within systems of differing water column stability (Hunter  
74 et al., 2008). Rapid changes caused by oscillatory diurnal variation in the distribution of  
75 cyanobacterial populations can challenge detection if community structure and system  
76 dynamics are not well characterized.

77 **Table 1:** A summary of characteristics of cyanobacteria and environmental conditions impacting buoyancy and spatial distribution in  
 78 the water column.

| <b>Characteristics of Cyanobacteria</b> |                                                                                                                                                                                                                                                           |                                                                                                                                                                                                                                                   |
|-----------------------------------------|-----------------------------------------------------------------------------------------------------------------------------------------------------------------------------------------------------------------------------------------------------------|---------------------------------------------------------------------------------------------------------------------------------------------------------------------------------------------------------------------------------------------------|
| Characteristic                          | Example Taxa                                                                                                                                                                                                                                              | Impact on Buoyancy                                                                                                                                                                                                                                |
| Cell Ballast Content                    | N/A                                                                                                                                                                                                                                                       | High photosynthetic rates result in accumulation of carbohydrates increasing cell density resulting in net downward migration (Chien et al., 2013; Hunter et al., 2008; Li et al., 2016; Westwood and Ganf, 2004)                                 |
| Gas Vacuolate                           | <i>Microcystis</i><br><i>Aphanizomenon</i><br><i>Nostoc</i><br><i>Anabeana</i><br><i>Oscillatoria</i><br><i>Coelosphaerium</i><br>(Staley, 1980; Walsby, 1981)                                                                                            | Provides positive buoyancy allowing for maintenance of position within the photic zone (Walsby et al., 1997).<br><br>Decreased gas vacuole content after exposure to high light irradiance results in loss of buoyancy (Westwood and Ganf, 2004). |
| Small & Unicellular                     | <i>Synechococcus</i><br><i>Cyanobium</i><br><i>Synechocystis</i><br><i>Cyanobacterium</i><br>(Sliwinska-Wilczeska et al., 2018)                                                                                                                           | Small cell size allows for maintenance of water column position (Reynolds et al., 1987; Śliwińska-Wilczewska et al., 2018).                                                                                                                       |
| Small & Colonial                        | <i>Aphanocapsa</i><br><i>Aphanothece</i><br><i>Chroococcus</i><br><i>Coelosphaerium</i><br><i>Cyanobium</i><br><i>Cyanodictyon</i><br><i>Merismopedia</i><br><i>Romeira</i><br><i>Snowella</i><br><i>Tetracerus</i><br>(Sliwinska-Wilczeska et al., 2018) | Smaller colonies exhibit more random spatial movement with no clear diurnal pattern (Chien et al., 2013).                                                                                                                                         |

|                                    |                                                           |                                                                                                                                                                                                                                                                            |
|------------------------------------|-----------------------------------------------------------|----------------------------------------------------------------------------------------------------------------------------------------------------------------------------------------------------------------------------------------------------------------------------|
| Large Colonial & Filamentous Forms | <i>Dolichospermum circinale</i> (Westwood and Ganf, 2004) | Larger colonies move more rapidly allowing for migration of greater depths (Reynolds et al., 1987; Westwood and Ganf, 2004)<br><br>Sinking rates are also faster (Ganf, 1974)                                                                                              |
| <b>Environmental Conditions</b>    |                                                           |                                                                                                                                                                                                                                                                            |
| Condition                          | Examples                                                  | Impact on Distribution                                                                                                                                                                                                                                                     |
| Water Column Stability             | Thermal Stratification                                    | Creates zonation in the water column frequently with nutrient depleted, light rich surface waters and light-limited, nutrient rich deep waters (Chien et al., 2013).<br><br>Vertical migrations allow for access to optimal environmental conditions (Chien et al., 2013). |
|                                    | Non-Stratified Water Columns                              | Wind induced mixing of the water column may result in homogeneous distributions (Frempong, 1981; Hunter et al., 2008; Wallsby et al., 1997).                                                                                                                               |
|                                    | External Mixing Events – Storms                           | Storm events may result in downward mixing of communities (Walsby et al., 1997).                                                                                                                                                                                           |
| Light Availability                 | Daytime                                                   | Exposure to high light in the daytime results in loss in buoyancy with high photosynthetic rate and accumulation of carbohydrates resulting in downward migration (Ibelings et al., 1991).                                                                                 |
|                                    | Nighttime                                                 | With light limitation and decreased photosynthetic rates, cellular carbohydrates are utilized resulting in decreased density and upward migration for light access in daytime (Ibelings et al., 1991).                                                                     |

80       The need to better describe cyanobacteria growth and behavior in freshwater systems  
81 is increasingly urgent because of climate variability and landscape change-associated  
82 impacts on freshwater systems. Global increases in eutrophication such as those  
83 described in recent continental-scale evidence from thousands of water bodies in the  
84 conterminous U.S. that led to the conclusion that dramatic reductions in the number of  
85 naturally oligotrophic streams and lakes have occurred since the turn of the century are  
86 likely linked to climate change driven extremes in precipitation and runoff that have  
87 exacerbated nutrient delivery to and primary productivity within these sensitive receiving  
88 waters (Stoddard et al., 2016). Effective risk management in response to the shifts  
89 requires accurate risk characterization. While the factors that lead to cyanotoxin  
90 production remain poorly understood, improved community characterization that reflects  
91 contemporary understanding of the diversity of cyanobacterial populations and their  
92 adaptations is essential to advancing the management of risks attributable to the presence  
93 of potentially toxic cyanobacteria in water supplies and better informing pre-emptive  
94 mitigation of potential health impacts and drinking water treatment challenges.

95       Critically, while diurnal vertical migration of cyanobacteria has been reported in  
96 marine (Olli, 1999) and eutrophic freshwater (Hunter et al., 2008; von Orgies-Rutenberg  
97 et al., 2018) systems, reports of diurnal vertical migration of cyanobacteria in  
98 oligotrophic freshwater lakes are scant. Previous diurnal characterization of  
99 cyanobacterial communities has utilized spectrophotometric analysis of chlorophyll-*a* and  
100 microscopic cell enumeration on samples to collected over a multi-time point sampling  
101 series, frequently limited to a 24-hour period (Frempong, 1981; Ganf, 1974; Gilbert et al.,  
102 2010; Ibelings et al., 1991; Olli, 1999; Shahraki et al., 2020). Studies using next-



103 generation sequencing technology to characterize diurnal variation in aquatic microbial  
104 communities are further limited in number and scope (Gilbert et al., 2010; Shahraki et al.,  
105 2020). While the use of multi-time point sampling series provides insights into the  
106 variability observed in community composition over a matter of hours, restriction to a  
107 single 24-hour period will not encompass the natural dynamic variability that aquatic  
108 systems may experience day-to-day. To fully characterize diurnal trends, sampling  
109 periods must extend outside of 24-hour periods and include consecutive days. Here, the  
110 impact of sampling time and depth on cyanobacterial community composition were  
111 evaluated using amplicon sequencing of the V4 region in the 16S rRNA gene. Taxonomic  
112 composition and community diversity analyses provided insights into diurnal trends in  
113 distribution and subsequently the impact of sampling time on detection of these  
114 organisms. Specifically, the fluctuations in cyanobacterial community composition were  
115 evaluated (i) over a multi-time point sampling period over a 48-hour window, and (ii)  
116 spatially within the water column of a stratified lake. The characterization of spatial and  
117 temporal trends present in cyanobacterial communities demonstrates the potential impact  
118 of sampling time and system specific conditions on detection and will provide critical  
119 insight into the development of cyanobacterial monitoring programs for oligotrophic  
120 freshwater systems.

## 121 **2. Methods**

### 122 *2.1 Study Site: Turkey Lakes Watershed*

123 The Turkey Lakes Watershed (TLW) Study was established in 1980 to investigate  
124 ecosystem effects of acidic atmospheric deposition; Jeffries et al. (1988) provide a  
125 comprehensive description of the physical characteristics of the watershed. In brief, it is

126 approximately 50 km north of Sault Ste Marie, Ontario on the Canadian Shield in an  
127 uneven-aged tolerant hardwood and mixed conifer forest landscape (Jeffries et al., 1988).  
128 It consists of four interconnected lakes fed by both first order streams and groundwater:  
129 Batchwana Lake, Wishart Lake, Little Turkey Lake and Big Turkey Lake (Jeffries et al.,  
130 1988; Figure S1). Except for Wishart, these lakes thermally stratify during summer and  
131 winter annually. The lakes are classified as oligotrophic to mesotrophic, and  
132 cyanobacteria are the dominant members of phytoplankton communities (Jeffries et al.,  
133 1988). The shallow depth of Wishart Lake often results in complete wind-induced mixing  
134 that precludes water column stratification; Little Turkey lake is deeper and regularly  
135 undergoes thermal stratification (Figure S2).

## 136 *2.2 Sample Collection*

137 Water samples were collected from the deepest point in Little Turkey  
138 (47°02'37.2"N 84°24'24.4"W) and Wishart (47°03'00.0"N 84°23'58.3"W) Lakes over a  
139 two-day period in August 2018 (August 22<sup>nd</sup> and 23<sup>rd</sup>) across three time points on both  
140 days: morning (8-9 a.m.), midday (12-1 p.m.) and afternoon (4-5 p.m.). Samples were  
141 collected from Secchi depth, the water depth at which light penetration is approximately  
142 1% of surface illumination is considered the maximum depth at which there is sufficient  
143 light for photosynthesis (Bukata et al., 1988). In Wishart Lake, these samples were  
144 collected from near the bottom (4 m) due to high water clarity. Secchi depths ranged from  
145 4 to 5.25 m in Little Turkey Lake. Water samples were also collected at the surface (0 m)  
146 in Little Turkey Lake on the first sampling day to evaluate potential temporal correlations  
147 in cyanobacterial communities between depths.

148 Water samples collected using a Masterflex E/S portable sampler peristaltic pump  
149 were filtered initially through a 47 mm GF/C filter (Whatman plc, Buckinghamshire,  
150 United Kingdom). After vacuum filtration, 250 mL of filtered water were filtered a  
151 second time through a 0.22  $\mu\text{m}$  Sterivex™ filter to collect additional microbes. The filters  
152 were stored at  $-20^{\circ}\text{C}$  prior to DNA extraction. Sampling details are provided in Table S1.

### 153 *2.3 DNA Extraction, 16S rRNA Gene Amplicon Sequencing*

154 DNA was extracted using the DNeasy PowerSoil Kit (QIAGEN Inc., Venlo,  
155 Netherlands) following the manufacturer's protocol. In brief, elution buffer was added to  
156 spin columns for 15 minutes prior to elution of the DNA extract. DNA was quantified  
157 using a NanoDrop spectrophotometer (Table S1); absolute values were only accurate at  
158 DNA concentrations of more than  $10\text{ng}/\mu\text{l}$ . The DNA extracts were submitted for  
159 amplicon sequencing using the Illumina MiSeq platform (Illumina Inc., San Diego,  
160 United States) at a commercial laboratory (Metagenom Bio Inc., Waterloo, ON). Primers  
161 designed to target the 16S rRNA gene V4 region [515FB  
162 (GTGYCAGCMGCCGCGGTAA) and 806RB (GGACTACNVGGGTWTCTAAT)]  
163 (Walters et al., 2015) were used for PCR amplification. Amplicon sequencing of the  
164 DNA extracts was conducted using the Illumina MiSeq platform (Illumina Inc., San  
165 Diego, United States).

### 166 *2.4 Sequence Processing & Library Size Normalization*

167 The program QIIME2 (v. 2019.10; (Bolyen et al., 2019) was used for  
168 bioinformatic processing. Demultiplexed paired-end sequences were trimmed and  
169 denoised, including the removal of chimeric sequences and singleton sequence variants,  
170 using DADA2 (Callahan et al., 2016) to construct the amplicon sequence variant (ASV)

171 table. Taxonomic classification was performed using a Naïve-Bayes taxonomic classifier  
172 trained using the SILVA138 database (Quast et al., 2013; Yilmaz et al., 2014).  
173 Taxonomic assignments for amplicon sequence variants (ASV) classified as  
174 Cyanobacteria at the phylum level were manually curated to reflect taxonomic levels  
175 above the genus level according to AlgaeBase (Guiry and Guiry, 2022). Files from  
176 QIIME2 were imported into R (v. 4.0.1; R Core Team, 2020) for downstream analyses  
177 using *qiime2R* (v. 0.99.23; Bisanz, 2018). Initial sequence libraries were filtered to  
178 exclude ASVs that were taxonomically classified as mitochondria or chloroplast  
179 sequences using *phyloseq* (v. 1.32.0; (McMurdie and Holmes, 2012). For cyanobacterial  
180 community analysis, ASVs classified as Cyanobacteria at the phylum level were filtered  
181 to create libraries consisting of only cyanobacterial sequences. They were normalized to a  
182 library size of 370 reads.

### 183 *2.5 Cyanobacterial Communities - Taxonomic Composition & Diversity Analyses*

184 Community composition was assessed at the taxonomic order level and relative  
185 abundances were visualized using a heatmap produced with *mirlyn* (Cameron and  
186 Tremblay, 2020). The implementation of relative abundances of taxonomic classifications  
187 of ASVs does not require additional library size normalization. Relative abundances were  
188 randomized across phyla within samples to identify significantly dominant groups within  
189 the microbial community in relation to sampling time with a Bonferroni correction.

190 To confirm the taxonomic classification performed by the Naïve-Bayes classifier,  
191 a phylogenetic tree was constructed in MEGA X (Kumar et al., 2018) using  
192 cyanobacterial reference sequences and sequences from samples (Figure S3). Sequences  
193 classified to the genera highlighted in guidelines and resources for sampling protocol

194 deigns (Graham et al., 2008; Vidal et al., 2021) including *Microcystis*, *Dolichospermum*  
195 (as *Anabaena* in Graham et al., 2008), *Aphanizomenon*, *Pseudanabaena*, and  
196 *Synechococcus* were selected for further evaluation. Notably, other taxa contributed to the  
197 compositional structure at the order level but were excluded from this analysis due to the  
198 frequent water quality management focus on bloom forming and toxic taxa. In addition  
199 to the aforementioned genera, sequences classified to the following were also included  
200 *Radiocystis* because of its 16S rRNA genes that are identical to *Microcystis* (Vidal et al.,  
201 2021) and toxicity (Vieira et al., 2003), and *Cyanobium*, which is a potentially toxic  
202 picocyanobacterial genera (Śliwińska-Wilczewska et al., 2018) that was detected in high  
203 relative abundances. Cyanobacterial orders were grouped by morphology as follows: (i)  
204 Unicellular Taxa – Synechococcales (*Cyanobium*, *Synechococcus*), (ii) Colonial –  
205 Nostocales (*Microcystis*, *Radiocystis*), and (iii) Filamentous – Nostocales  
206 (*Dolichospermum*, *Anabaena*, *Aphanizomenon*) and *Pseudanabaena* (Order –  
207 Synechococcales) to characterize the potential variation in diurnal movements dependent  
208 on cell size and shape. Notably, the genus *Pseudanabaena* initially was classified as  
209 Oscillatoriales based on the filamentous morphology, but recent genomic sequencing and  
210 examination of ultrastructural characteristics has resulted in reclassification into the order  
211 Synechococcales (Vidal et al., 2021). ASVs classified to the genus *Pseudanabaena* were  
212 included with other filamentous taxa. Relative abundances of the cyanobacterial  
213 sequences were visualized using a heatmap and evaluated based on unicellular,  
214 filamentous, or colonial morphologies to characterize taxa-specific diurnal trends

215 As amplicon sequencing only indirectly and partially represents source diversity  
216 and clustering, amplification, and the lack of certainty about how many zeros should be

217 included in the data compromise statistical inference about source diversity (Schmidt et  
218 al., 2021), community diversity analyses were performed using *mirlyn* on libraries that  
219 were repeatedly rarefied (Cameron et al., 2021). The Shannon Index (Shannon, 1948), an  
220 alpha diversity metric, was analyzed for sample comparison to identify trends in sample  
221 diversity as a function of time. Rarefied libraries were also used for beta-diversity  
222 analyses and rarefied libraries were transformed using a Hellinger transformation  
223 (Legendre and Gallagher, 2001). Hellinger transformed data were used to calculate Bray-  
224 Curtis distances (Bray and Curtis, 1957) used in principal component analysis (PCA).

## 225 *2.6 Data Availability*

226 Sequence data analyzed in this study is available in the European Nucleotide  
227 Archive (ENA) under study accession ERP134980.

## 228 **3. Results & Discussion**

### 229 *3.1 Diurnal Variation in Cyanobacterial Communities*

230 Cyanobacterial relative abundances were higher in Little Turkey Lake than  
231 Wishart Lake (Figure 1A; Table 2). In Little Turkey Lake, the increase in relative  
232 abundance of cyanobacteria exhibited diurnal trends with significant representation in the  
233 microbial community on both sampling days during the afternoon sampling time point ( $p$   
234 = 0.011,  $p$  = 0.001, respectively; Table S2) and midday on the second sampling day ( $p$  =  
235 0.0006), but not the first day ( $p$  = 0.27). Further variation between the representation of  
236 cyanobacteria in the microbial community of Little Turkey Lake was observed in  
237 morning sampling, between the first ( $p$  = 1) and second sampling days ( $p$  = 0.28)  
238 indicating differences in microbial community composition between consecutive days  
239 (Figure S4). Unlike Little Turkey Lake, Wishart Lake did not exhibit a consistent and

240 recurring increase in the relative abundances from morning to afternoon; cyanobacteria  
241 were not significantly represented in the microbial community at any point and their  
242 relative abundance remained consistent over the period of evaluation ( $p = 1$ ) (Figure 1B;  
243 Table 2).

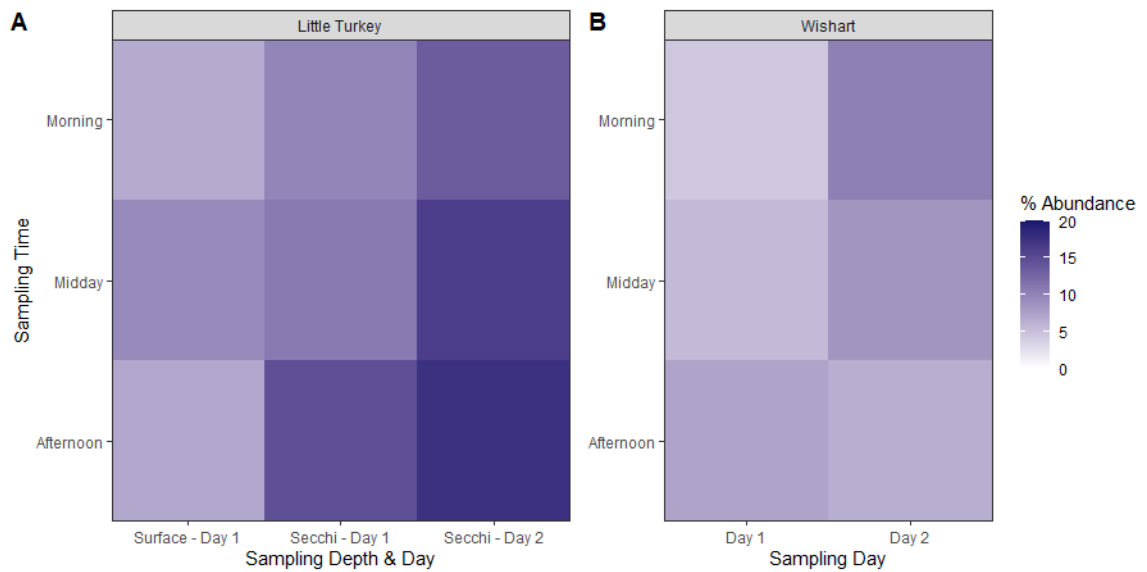

244

245 **Figure 1:** Heatmap depicting the composition of cyanobacterial communities at the order  
246 level across a multi-time point sampling series in a stratified (Little Turkey) and non-  
247 stratified (Wishart) lake. Amplicon sequence variants of the V4 region of the 16S rRNA  
248 gene classified to the phylum Cyanobacteria were selected to examine the contribution of  
249 cyanobacterial communities to the bacterial community at (A) surface waters and Secchi  
250 depth in Little Turkey Lake, and (B) Secchi depth in Wishart Lake. At Secchi depth,  
251 cyanobacteria exhibited increased abundances later in the day in the stratified lake but no  
252 consistent diurnal trend in the non-stratified lake.

253  
254

**Table 2:** Relative abundances of cyanobacteria within the microbial community and subsequent composition of cyanobacteria communities. Values were rounded to two decimal points and excluded groups that were present at less than 1% abundance.

| Taxonomic Group        | Day 1         |         |         | Day2          |         | Sampling Time |
|------------------------|---------------|---------|---------|---------------|---------|---------------|
|                        | Little Turkey |         | Wishart | Little Turkey | Wishart |               |
|                        | Secchi        | Surface |         |               |         |               |
| <b>Cyanobacteria</b>   | 9.91          | 6.67    | 4.39    | 13.42         | 10.34   | Morning       |
|                        | 10.74         | 9.30    | 5.47    | 16.28         | 8.47    | Midday        |
|                        | 14.62         | 6.97    | 7.31    | 17.53         | 6.46    | Afternoon     |
| <b>Chroococcales</b>   | 33.55         | 26.98   | 2.43    | 15.66         | 2.69    | Morning       |
|                        | 10.18         | 26.13   | 3.19    | 12.54         | 4.03    | Midday        |
|                        | 16.27         | 23.41   | 1.87    | 16.30         | 3.59    | Afternoon     |
| Chroococcaceae         | 12.00         | 7.13    | -       | 2.85          | 1.41    | Morning       |
|                        | 2.20          | 9.35    | 1.09    | 3.93          | 1.04    | Midday        |
|                        | 4.99          | 8.58    | -       | 5.52          | 1.79    | Afternoon     |
| Microcystaceae         | 15.33         | 16.25   | 1.08    | 7.62          | -       | Morning       |
|                        | 4.41          | 13.26   | -       | 4.01          | 1.55    | Midday        |
|                        | 5.52          | 10.66   | 1.09    | 5.18          | 1.79    | Afternoon     |
| <b>Nostocales</b>      | 1.33          | 1.81    | -       | -             | -       | Morning       |
|                        | 0.72          | 1.08    | -       | -             | 0.22    | Midday        |
|                        | 0.70          | 2.20    | -       | 0.17          | -       | Afternoon     |
| <b>Oscillatoriales</b> | -             | -       | -       | -             | -       | Morning       |
|                        | -             | -       | -       | -             | -       | Midday        |
|                        | -             | -       | -       | -             | -       | Afternoon     |
| <b>Synechococcales</b> | 62.03         | 66.09   | 91.89   | 82.00         | 90.28   | Morning       |
|                        | 87.77         | 69.93   | 93.10   | 85.70         | 89.67   | Midday        |
|                        | 81.19         | 71.24   | 89.86   | 81.39         | 90.54   | Afternoon     |



|                   |       |       |       |       |       |           |
|-------------------|-------|-------|-------|-------|-------|-----------|
| Coelosphaeriaceae | 2.93  | 1.24  | 1.35  | 3.20  | 1.29  | Morning   |
|                   | 2.36  | 1.92  | -     | 2.32  | -     | Midday    |
|                   | 4.29  | 3.34  | -     | 2.82  | -     | Afternoon |
| Merismopediaceae  | 1.07  | 1.41  | -     | -     | -     | Morning   |
|                   | -     | 1.09  | -     | -     | -     | Midday    |
|                   | -     | -     | -     | 1.11  | -     | Afternoon |
| Pseudanabaenaceae | -     | -     | 4.32  | -     | 2.58  | Morning   |
|                   | -     | -     | 14.37 | -     | 1.85  | Midday    |
|                   | -     | -     | 2.34  | -     | 8.46  | Afternoon |
| Synechococcaceae  | 61.87 | 66.42 | 87.57 | 82.35 | 87.70 | Morning   |
|                   | 88.05 | 70.47 | 78.74 | 85.86 | 87.82 | Midday    |
|                   | 81.44 | 71.37 | 87.52 | 81.60 | 82.11 | Afternoon |

256           In Little Turkey Lake, the significant representation of cyanobacterial sequences  
257 in the afternoon suggests the occurrence of daily vertical migrations of cyanobacteria in  
258 the water column. This observation is consistent with previous reports of diurnal vertical  
259 migration arising from buoyancy regulation in response to environmental changes  
260 (Howard, 2001). Water column stratification in Little Turkey Lake likely creates light  
261 limited environments at deeper depths. The increase in relative abundances of  
262 cyanobacterial sequences that was observed at Secchi depth at midday and in the  
263 afternoon is consistent with the downward migration of surface populations to avoid high  
264 light irradiance (Olli, 1999) and increased cellular density through accumulation of  
265 photosynthetic products (Chu et al., 2007; Xiao et al., 2012).

266           Unlike Little Turkey Lake, Wishart Lake exhibited similar relative abundances of  
267 cyanobacterial sequences throughout the multi-time point sampling series due to the  
268 shallow non-stratified water column. Vertical distribution of cyanobacteria in shallow  
269 lakes that are not stratified have been shown to be less dependent on the light cycle  
270 (Ibelings et al., 1991) supporting the non-temporal response observed in Wishart Lake.  
271 Although Wishart and Little Turkey Lake are interconnected and are located within the  
272 same watershed, both lakes exhibited differing relative abundances and diurnal trends  
273 indicating the dynamic nature of cyanobacterial communities in individual systems.  
274 While the scope of this study is still limited by the number of sampling days and sites, the  
275 variation observed between sampling times on these days exhibits the potential dynamic  
276 nature and distribution of aquatic microbial communities that can occur between  
277 consecutive days. This warrants the development of sampling protocols and supports the

278 notion that universal sampling strategies are near impossible to design (Pobel et al.,  
279 2011).

280           In addition to examining the daily trends of cyanobacterial relative abundances at  
281 Secchi depth, samples collected at the surface of Little Turkey Lake were assessed over  
282 the three time points in a single day to identify diurnal trends arising between different  
283 depths within a stratified water column. At the surface, relative abundances varied over  
284 time (6.67 – 9.30%; Figure 1A; Table 2) but were consistently lower than those at Secchi  
285 depth. Unlike the Secchi depth community, the relative abundances of cyanobacterial  
286 sequences at the surface were not significantly represented in the bacterial community  
287 over the sampling period ( $p = 1$ ) indicating no changes over time (Figure S5). The  
288 markedly different cyanobacterial relative abundances detected between surface and  
289 Secchi depths underscore the importance of including across a range of depths in  
290 monitoring protocols focused on risk management so that cyanobacterial communities are  
291 not underestimated; notably, in the present investigation, surface sampling alone—which  
292 is a common water monitoring sampling approach (Graham et al., 2008)—would have  
293 severely underestimated cyanobacterial abundance. Accordingly, these data demonstrate  
294 that diurnal migrations of cyanobacteria necessitate the need for discrete depth sampling  
295 across the water column so that cyanobacterial communities can be accurately  
296 characterized, and risk can be effectively managed. While discrete depth sampling  
297 provides important insights regarding cyanobacterial community membership and its  
298 variability across the depth of the water column (and thus represents significant  
299 advancement over sole reliance on surface sampling), it is impossible to characterize true  
300 population size, diversity, and distribution in the absence of full depth profiles.

301           Cyanobacteria sequence libraries were repeatedly rarefied to a normalized library  
302 size of 370 to explore diurnal trends in community diversity (Figure 2). The diversity of  
303 the cyanobacterial community in Little Turkey Lake at Secchi depth indicated small  
304 fluctuations that were not linked to specific diurnal responses. For example, the Shannon  
305 Index decreased from morning to afternoon on the first sampling day but increased on the  
306 second day. Alternatively, diversity peaked at midday in Wishart Lake (Figure 2A). In  
307 contrast, in Little Turkey Lake, surface communities were less diverse than those Secchi  
308 depth in the morning (Figure 2B). Later in the day, however, the Shannon Index was  
309 almost equivalent at these two depths. While the diversity of communities at the surface  
310 remained relatively consistent over the course of a day, the diversity at Secchi depth  
311 slightly decreased by afternoon of the first day, suggesting potential for downward  
312 migration in the stratified layer during the afternoon sampling period. These data  
313 underscore that cyanobacteria sampling protocol designs should include community  
314 characterization across the depth of the water column at various times during the day to  
315 ensure that the complete genetic and functional diversity of cyanobacterial communities  
316 is reflected to inform risk management.

317           Similarity between communities across sampling times, lake sites, and sampling  
318 depths was analyzed using Bray-Curtis dissimilarity and visualized using a PCA  
319 ordination on the rarefied data (Figure 2C). Cyanobacterial communities within lakes  
320 were found to be more similar within lakes than between lakes, with distinct clusters  
321 formed for Little Turkey and Wishart Lake. Additional similarity was observed within  
322 lakes between sampling time points across sampling days, except in the morning on the  
323 first day, which is discussed below in *Section 3.3*. The innate dissimilarity between

324 sampling depths and sampling sites in interconnected lakes within the same watershed  
325 further emphasizes the need for sampling approaches that can sufficiently capture  
326 ecological community structures that may ultimately contribute to signaling the potential  
327 for bloom formation, or toxin or taste and odor production.

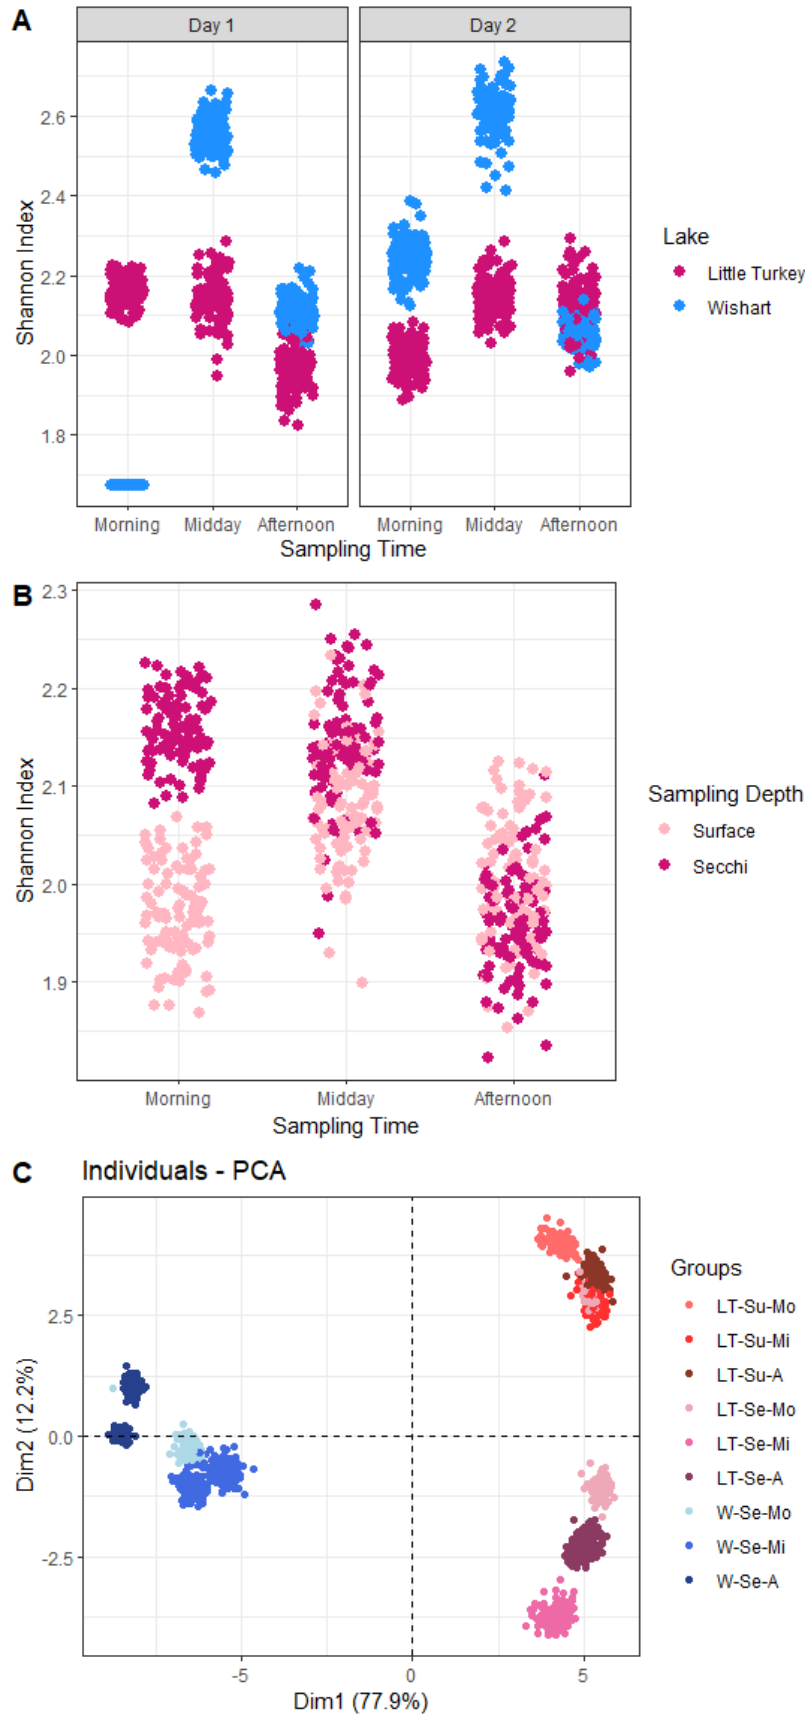

329 **Figure 2:** Alpha and beta-diversity analyses of cyanobacterial communities collected  
330 across a multi-time point sampling series in a stratified (Little Turkey) and non-stratified  
331 lake (Wishart). Amplicon sequence variants classified to the phylum Cyanobacteria were  
332 filtered to characterize diversity within cyanobacterial communities. The Shannon Index  
333 was calculated on rarefied libraries to evaluate the effects of (A) lake site and sampling  
334 time on community diversity and (B) sampling depth and sampling time on community  
335 diversity. (C) The Bray-Curtis dissimilarity metric was used to explore similarities in  
336 communities between sampling times (Morning = Mo, Midday = Mi, Afternoon = A),  
337 lake site (Little Turkey = LT, Wishart = W) and sampling depth (Su = Surface, Se =  
338 Secchi) demonstrating unique communities between sampling depth and lake site.

339

### 340 *3.2 Diurnal Trends of Bloom Forming & Toxic Cyanobacterial Taxa*

341 Taxa specific diurnal responses were evaluated by assessing the taxonomic and  
342 ASV composition of the cyanobacterial communities. A total of 41 ASVs classified to the  
343 phylum Cyanobacteria were identified across the samples collected; these included taxa  
344 belonging to the cyanobacterial orders Chroococcales, Nostocales, and Synechococcales  
345 (Table 3) and are contextualized below based on their respective morphologies.

346 **Table 3:** Taxonomic classification of potentially bloom-forming and toxic Cyanobacteria  
347 classified amplicon sequence variants in the diurnal sampling series.

| ASV    | Taxonomic Classification | Lake Site               |
|--------|--------------------------|-------------------------|
| ASV819 | Nostocales               | Little Turkey           |
| ASV822 | Nostocales               | Little Turkey           |
| ASV824 | Nostocales               | Little Turkey           |
|        |                          |                         |
| ASV838 | Synechococaceae          | Wishart                 |
| ASV839 | Synechococaceae          | Little Turkey & Wishart |

|         |                      |                         |
|---------|----------------------|-------------------------|
| ASV842  | Synechococcaceae     | Wishart                 |
| ASV843  | Synechococcaceae     | Wishart                 |
| ASV846  | Synechococcaceae     | Little Turkey & Wishart |
| ASV848  | Synechococcaceae     | Little Turkey & Wishart |
| ASV849  | Synechococcaceae     | Wishart                 |
| ASV850  | Synechococcaceae     | Little Turkey & Wishart |
| ASV853  | Synechococcaceae     | Wishart                 |
| ASV855  | Synechococcaceae     | Little Turkey & Wishart |
| ASV857  | Synechococcaceae     | Wishart                 |
| ASV858  | Synechococcaceae     | Wishart                 |
| ASV859  | Synechococcaceae     | Wishart                 |
| ASV865  | Synechococcaceae     | Little Turkey & Wishart |
| ASV866  | Synechococcaceae     | Little Turkey & Wishart |
| ASV869  | Synechococcaceae     | Wishart                 |
| ASV921  | Synechococcaceae     | Wishart                 |
|         |                      |                         |
| ASV919  | <i>Radiocystis</i>   | Little Turkey & Wishart |
| ASV913  | <i>Microcystis</i>   | Little Turkey           |
| ASV 914 | <i>Microcystis</i>   | Little Turkey & Wishart |
|         |                      |                         |
| ASV806  | <i>Pseudanabaena</i> | Wishart                 |

348

### 349 3.2.1 Unicellular Taxa

350 Irrespective of time of day, both lakes were dominated by sequences classified to  
351 the order Synechococcales (Figure 3), and family Synechococcaceae (Table 2), which  
352 includes unicellular picocyanobacterial genera such as *Synechococcus* and *Cyanobium*.  
353 The dominance of Synechococcaceae classified ASVs over the sampling period indicates  
354 a lack of distinct diurnal migrations. This result is not surprising because smaller sized  
355 taxa are able to maintain water column position better than larger colonial and



356 filamentous taxa (Śliwińska-Wilczewska et al., 2018; Yamamoto and Nakahara, 2006). In  
357 Little Turkey Lake, Synechococcaceae ASVs were found in higher relative abundances at  
358 Secchi depth, possibly due to the higher abundance of gas vacuolate taxa at the surface  
359 (discussed below in *Section 3.3.2*). Notably, the high relative abundances of  
360 Synechococcaceae ASVs at Secchi depth include the presence of potentially toxic  
361 picocyanobacterial taxa that would be overlooked by sampling programs reliant only on  
362 surface sampling.

363         While the cyanobacteria communities in both lakes were dominated by the ASVs  
364 classified to the family Synechococcaceae, substantial differences in composition were  
365 observed between Little Turkey (Figure 4A) and Wishart Lakes (Figure 4B). Specifically,  
366 Little Turkey Lake included 7 ASVs and Wishart Lake included 17 ASVs, thereby  
367 demonstrating considerable differences in community composition between systems  
368 within the same watershed. ASV848 was observed consistently in high relative  
369 abundances in both lakes and ASV846 was noted in high relative abundances in Little  
370 Turkey Lake. Despite belonging to the same taxonomic family, these ASVs exhibited  
371 distinct diurnal patterns in abundance. For example, ASV848 exhibited a decrease in  
372 abundance at midday, while ASV846 peaked. Although Wishart Lake exhibited general  
373 homogeneity in diurnal variation of cyanobacteria relative abundances, individual ASVs  
374 exhibited unique diurnal responses. For example, ASV855, ASV859, ASV850, and  
375 ASV849 were absent in morning periods on both sampling days but were present in the  
376 midday or afternoon. The consistent and ephemeral occurrence of the different  
377 Synechococcaceae ASVs would likely be missed by traditional monitoring approaches.

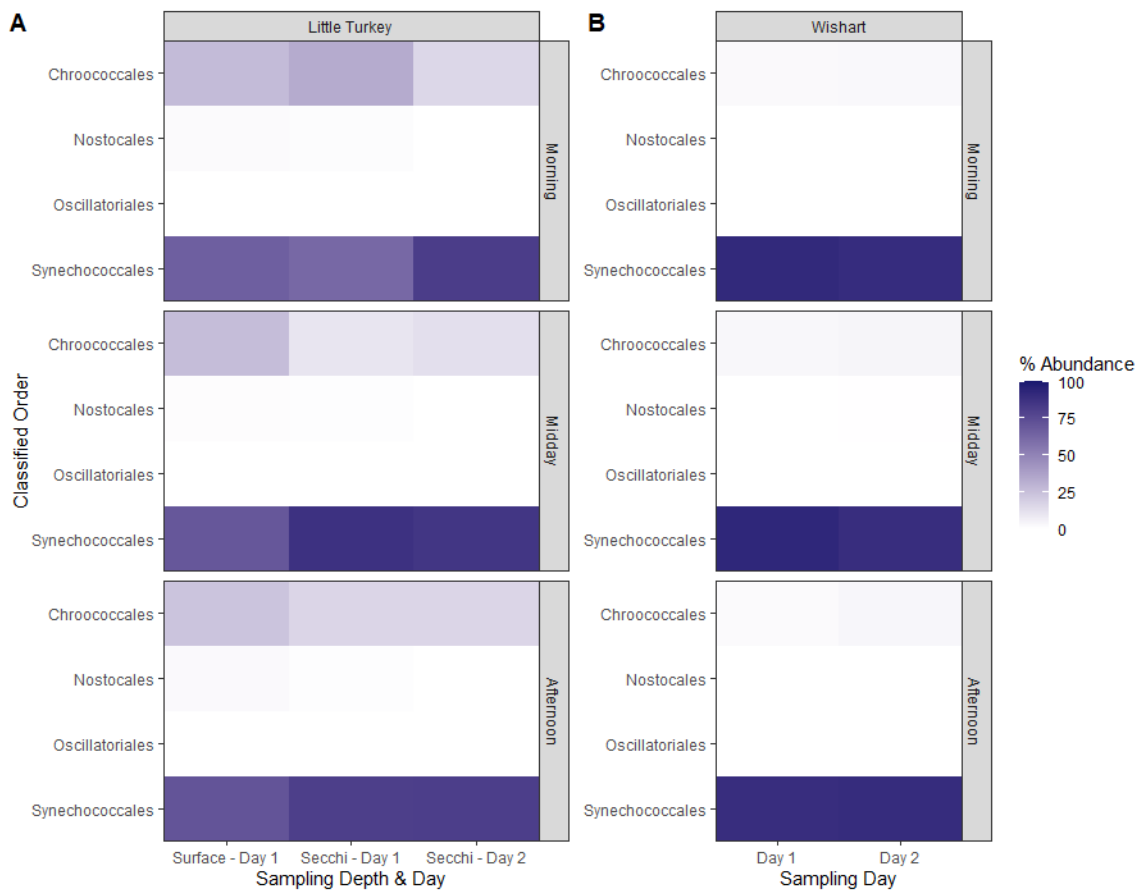

378

379 **Figure 3:** Heatmap depicting the composition of cyanobacterial communities at the order  
380 level across a multi-time point sampling series in a stratified (Little Turkey) and non-  
381 stratified (Wishart) lake. Amplicon sequence variants of the V4 region of the 16S rRNA  
382 gene were classified to the phylum Cyanobacteria were selected to examine the  
383 taxonomic composition of cyanobacterial communities at (A) surface waters and Secchi  
384 depth in Little Turkey Lake, and (B) Secchi depth in Wishart Lake. Cyanobacterial  
385 communities in both lakes were consistently dominated by the order, Synechococcales  
386 which contains potentially toxic picocyanobacterial genera.

387

### 388 3.2.2 Colonial & Filamentous Taxa

389 Chroococcales and Nostocales were observed in lower relative abundances in  
390 Little Turkey (Figure 3A) and Wishart Lake (Figure 3B) but nonetheless contributed to  
391 the differences in compositional structure of the cyanobacterial communities in these  
392 lakes. Little Turkey Lake had a larger Chroococcales population than Wishart Lake  
393 (Figure 2; Table 2). Nostocales sequences were detected in Little Turkey Lake but were  
394 largely undetected in Wishart Lake. Further uniqueness of cyanobacteria communities  
395 between systems was also observed at the ASV level. Specifically, ASV806 (classified to  
396 the genus *Pseudanabaena*) was only detected in Wishart Lake (Figure 4D) and  
397 Nostocales ASVs (ASV824, 822 819) were only detected in Little Turkey Lake (Figure  
398 4C). Further unique ASV composition was observed with the detection of ASV913  
399 (classified to the genus *Microcystis*) in Wishart Lake at very low relative abundances  
400 (Figure 4F), but larger relative abundances of ASV914 (classified to the genus  
401 *Microcystis*) and ASV919 (classified to the genus *Radiocystis*) in Little Turkey Lake  
402 (Figure 4E).

403 Within samples, sequences attributed to taxa that contain gas vesicles, including  
404 *Microcystis*, *Dolichospermum*, and *Aphanizomenon*, were detected. Sequences classified  
405 to these genera including ASV824 (classified to the genus *Dolichospermum*), and  
406 ASV914 (classified to the genus *Microcystis*), were consistently detected at the surface in  
407 Little Turkey Lake demonstrating positive buoyancy regulation due to the presence of gas  
408 vesicles. Diurnal variation associated with downward migration during the daylight was  
409 exhibited in the surface populations of ASV919 (classified to the genus *Radiocystis*) as a

410 consistent decrease in abundance was observed from morning to afternoon exhibiting the  
411 expected diurnal migration trend. While taxa with gas vesicles were detected regularly in  
412 surface samples of Little Turkey Lake, ASV819 (classified to the genus  
413 *Dolichospermum*) and ASV822 (classified to the order Nostocales) were only detected at  
414 Secchi depth indicating that gas vacuolate taxa may be found deeper in the water column  
415 and supporting the distribution of cyanobacteria through the photic zone and not only as  
416 surface accumulations (Graham et al., 2008). The diurnal presence of taxa with gas  
417 vesicles at depths other than the surface provides not only empirical, but mechanistic  
418 justification for expanding cyanobacteria monitoring programs designed to water supplies  
419 used for potable water production and recreation.

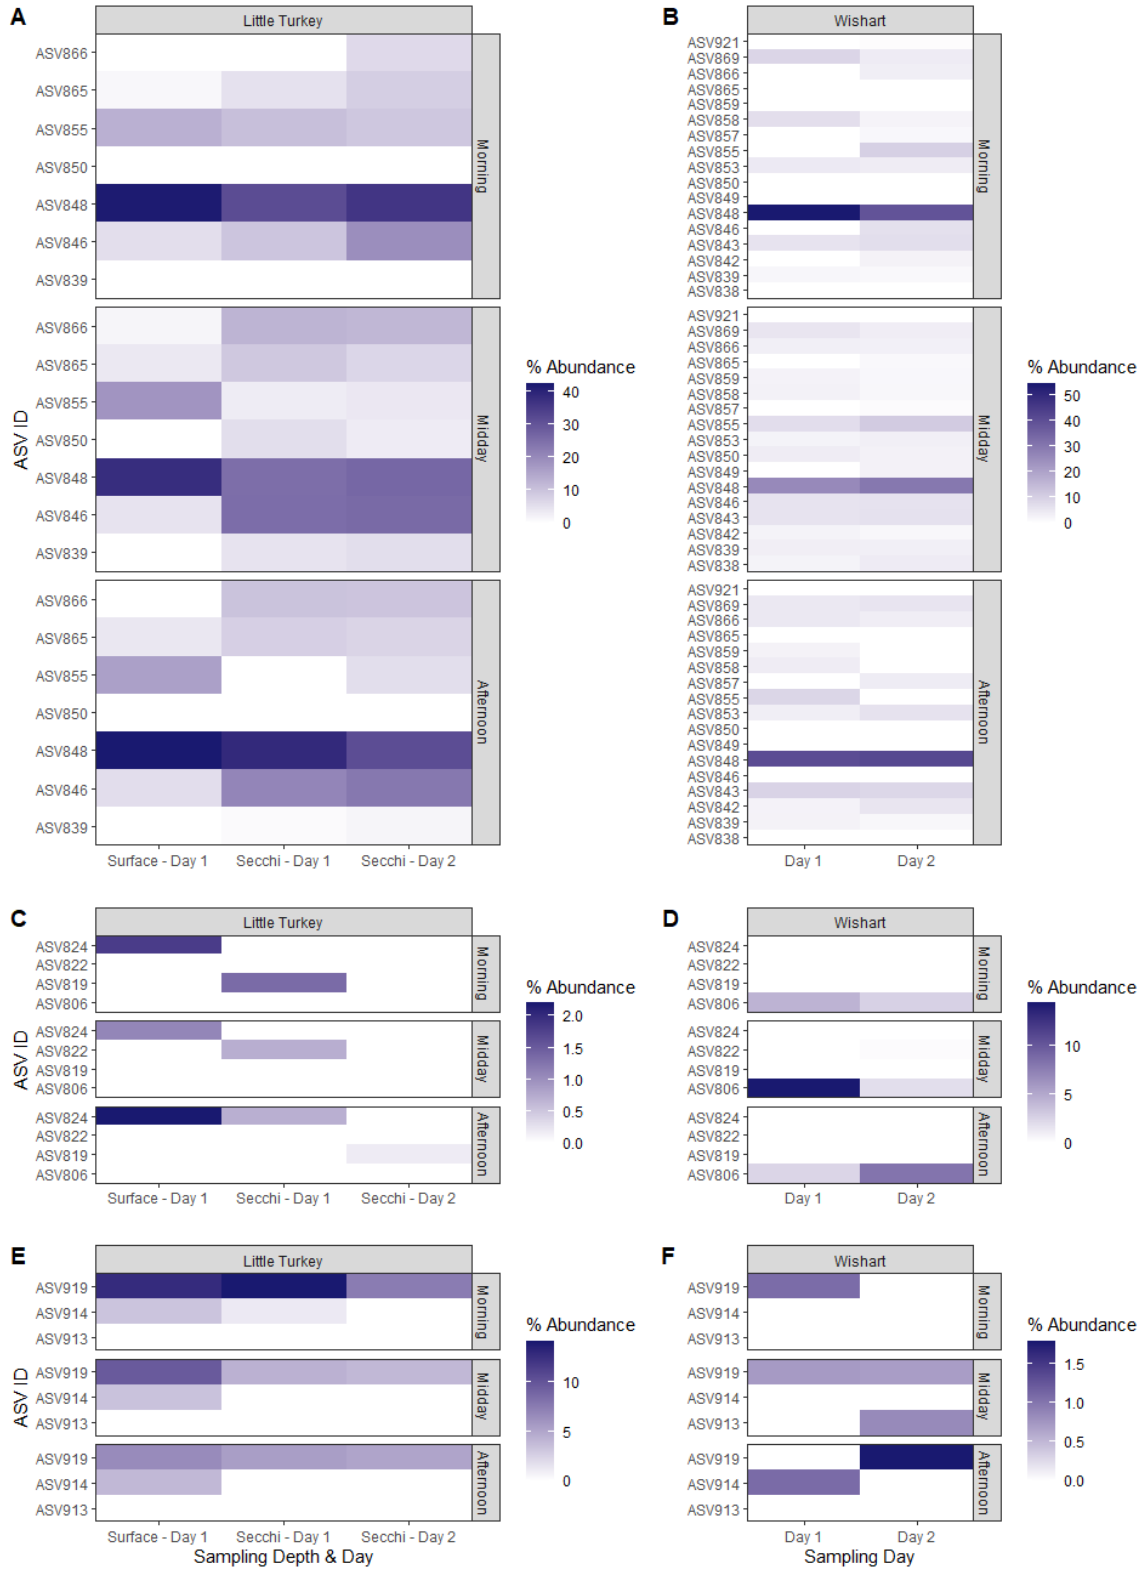

420

421 **Figure 4:** Heatmap depicting the relative abundances of individual amplicon sequence  
422 variants of interest across a multi-time point sampling series in a stratified (Little Turkey)  
423 and non-stratified (Wishart) lake. Amplicon sequence variants (ASV) of the V4 region of  
424 the 16S rRNA gene classified to the phylum Cyanobacteria to highlight diurnal responses  
425 of common toxic and bloom forming genera including Synechococcaceae  
426 (*Synechococcus*, *Cyanobium*), Nostocales (*Anabaena*, *Aphanizomenon*), *Pseudanabaena*  
427 and Microcystaceae (*Microcystis*, *Radiocystis*). Relative abundances of individual ASVs  
428 in cyanobacterial community composition for (A/B) unicellular taxa (Synechococcaceae),  
429 (C/D) filamentous taxa (Nostocales & *Pseudanabaena*), and (E/F) colonial taxa  
430 (Microcystaceae) to identify taxa specific diurnal responses.

431

### 432 *3.3 Rainfall Impacts on Cyanobacteria Distribution*

433 Cyanobacterial communities at Secchi depth in the morning of the first sampling  
434 day were highly similar to the surface communities in Little Turkey Lake, a phenomenon  
435 that was not observed subsequently (Figure 2C). Although similar order level  
436 composition in cyanobacterial communities across sampling times at surface and Secchi  
437 depth was observed (Figure 3A), the relative abundance of the order Chroococcales, was  
438 higher at Secchi depth in the morning of the first sampling day, and similar to that  
439 observed at the surface. Similarly, ASV919 (classified to the genus *Radiocystis*) and  
440 ASV914 (classified to the genus *Microcystis*) were detected at higher relative abundances  
441 in the morning period of the first sampling day (Figure 4E). Notably, a heavy rainfall  
442 event occurred during the overnight period prior to the first sampling day. Storm events  
443 have been previously associated with downward mixing of cyanobacterial communities

444 in lakes (Walsby et al., 1997); thus, it is possible that the overnight storm redistributed  
445 the surface communities across the water column in Little Turkey Lake, otherwise  
446 atypical observation of community similarity at surface and Secchi depths on the morning  
447 of the first sampling day.

448 Unlike Little Turkey Lake, distributions of cyanobacteria in Wishart Lake did not  
449 exhibit obvious impacts of the rainfall event. High dissimilarity in community  
450 composition was not observed between the morning of the first sampling day and  
451 subsequent time points (Figure 2C) and taxonomic composition of communities at the  
452 order level were consistent across sampling times (Figure 3B). Previous diurnal studies  
453 on freshwater microbial communities did not show an impact of meteorological  
454 conditions on bacterial abundances (Filippini et al., 2008) indicating that the response to  
455 meteorological conditions may be system specific. The potential for system specific  
456 responses to external mixing events as demonstrated in Little Turkey and Wishart Lake  
457 further signifies the importance of utilizing unique protocols tailored to system dynamics.

#### 458 *3.4 Drinking Water Reservoir Monitoring Implications*

459 The observation of diurnal vertical migration of cyanobacteria in oligotrophic  
460 lakes reported herein emphasizes the importance of incorporating sampling time into  
461 monitoring protocols that do not utilize depth integrated sampling. Here, cyanobacterial  
462 relative abundances continued to fluctuate between the hours of 9 a.m. and 4 p.m.  
463 demonstrating that large, generalized time frames are too broad to apply universally to  
464 varying aquatic systems. Consequently, limiting sample collection to a single time point  
465 or discrete depth in stratified lakes may result in vast underestimation of cyanobacterial  
466 relative abundances. While cyanobacteria sampling protocols and guidelines do

467 sometimes speak to the time and depth of sample collection, guidance is often vague and  
468 refers to collection of “surface waters” at times “later in the day” or from “10 a.m. to  
469 3 p.m.” (Table 4).



470 **Table 4:** A summary of cyanobacteria monitoring sampling protocol features and  
 471 potential impact on detection.

| Sampling Protocol Design Feature     | References                                                                                                                                                                                                                                         | Impact on Detection                                                                                                                                                                                                                                                                                             |
|--------------------------------------|----------------------------------------------------------------------------------------------------------------------------------------------------------------------------------------------------------------------------------------------------|-----------------------------------------------------------------------------------------------------------------------------------------------------------------------------------------------------------------------------------------------------------------------------------------------------------------|
| <i>Recommended Sampling Time</i>     |                                                                                                                                                                                                                                                    |                                                                                                                                                                                                                                                                                                                 |
| No optimal sampling time advisory    | Chorus et al., 2000; Chorus and Bartram, 1999; Graham et al., 2008; Lake and Management, 2015                                                                                                                                                      | Inconsistent and/or arbitrary sampling time will result in variation in the detection of cyanobacteria populations.                                                                                                                                                                                             |
| 10 a.m. – 3p .m.                     | Klamath river blue green algae working group, 2009; University of New Hampshire - Center for Freshwater Biology, 2010                                                                                                                              | Cyanobacterial populations will experience fluctuations during the large timeframe. Samples collected at 10 a.m. will differ in composition from samples collected at 3 p.m. due to water column migration resulting in the potential for missed detection or underrepresentation of cyanobacteria populations. |
| “Later in the day”                   | Water Quality Research Australia and Global Water Research Coalition, 2009                                                                                                                                                                         | Sample collection time is dependent on user interpretation of “later in the day” which creates bias from the interpretation of sampling protocol.                                                                                                                                                               |
| Morning (for surface sampling only)  | Ministry for the Environment and Ministry of Health., 2009                                                                                                                                                                                         | Sampling of surface water in the morning period is appropriate due to known trends in water column migration of cyanobacteria populations.                                                                                                                                                                      |
| <i>Recommended Sampling Depth</i>    |                                                                                                                                                                                                                                                    |                                                                                                                                                                                                                                                                                                                 |
| Integrated water column depth sample | Klamath river blue green algae working group, 2009; Colorado Lake and Reservoir Management, 2015; Ministry for the Environment and Ministry of Health., 2009; Ohio Environmental Protection Agency, 2013; Sarnelle et al., 2010; University of New | Integrated depth sampling accounts for the potential of daily variation in cyanobacteria populations.                                                                                                                                                                                                           |

|                         |                                                                                                                                       |                                                                                                 |
|-------------------------|---------------------------------------------------------------------------------------------------------------------------------------|-------------------------------------------------------------------------------------------------|
|                         | Hampshire - Center for Freshwater Biology, 2010                                                                                       |                                                                                                 |
| Surface waters          | Sarnelle et al., 2010                                                                                                                 | Surface water should only be sampled in morning periods in lakes with stratified water columns. |
| 1 metre below surface   | Graham et al., 2008                                                                                                                   |                                                                                                 |
| 0 – 50 cm below surface | Klamath river blue green algae working group, 2009; Ministry for the Environment and Ministry of Health., 2009; Sarnelle et al., 2010 |                                                                                                 |

472

473           While depth integrated sampling is sometimes suggested and allows for  
474 characterization of cyanobacterial communities across the water column with a single  
475 sample (Ministry for the Environment and Ministry of Health., 2009; Newcombe, 2009;  
476 Ohio Environmental Protection Agency, 2013; Sarnelle et al., 2010; University of New  
477 Hampshire - Center for Freshwater Biology, 2010), trade-offs in sensitivity are  
478 recognized, but not been well described. Moreover, insights to community dynamics  
479 including factors that may contribute to bloom formation, toxin production, or risk  
480 mitigation may be obscured or confounded using these approaches. In contrast, discrete  
481 sampling allows for the characterization of associated heterogeneities in cyanobacterial  
482 populations (Vidal et al., 2014) and focus on specific points of interest such as water  
483 treatment plant intakes (Graham et al., 2008).

484           Critically, the increased availability and rapidly decreasing costs of NGS tool  
485 have eliminated most of the barriers to their wider use in resource management and the  
486 drinking water industry. The insights enabled by these approaches allow for proactive  
487 rather than reactive management of drinking water supplies (Chapman, 2010). It is  
488 important to note that although amplicon sequencing has revolutionized our ability to  
489 study microbial communities, these data do not quantify abundance of community  
490 members. Rather, they only indicate community composition and relative abundance  
491 (Gloor et al., 2017, 2016); this introduces challenges in the interpretation of changes in  
492 community structure. For example, an observed decrease in relative abundances of  
493 cyanobacteria, may only be an artifact of increased relative abundances of sequences  
494 classified to other taxonomic groups and not be representative of an actual absolute  
495 decrease in cyanobacterial populations. Traditional cell enumeration techniques (e.g.,

496 flow cytometry; Patel et al., 2019) or other molecular techniques (e.g., qPCR; Chiu et al.,  
497 2017) can be used to supplement amplicon sequencing with cyanobacterial community  
498 density data, however.

499         The design of sample collection schemes is closely linked to the utility of the  
500 information that is delivered using these approaches. The analysis provided herein has  
501 delivered clear evidence to demonstrate the need for integrating multi-timepoint, multi-  
502 depth discrete sampling guidance into lake and reservoir monitoring programs to  
503 proactively understand cyanobacteria community dynamics and hopefully signal change  
504 inform risk management associated with the potential for cyanotoxin production. This  
505 work further emphasized that cyanobacteria are present in oligotrophic lakes and their  
506 community structure varies (i) diurnally, (ii) across the depth of the water column, and  
507 (iii) between different lakes that are closely interconnected within the same watershed.  
508 Ignoring this variability and reducing sample numbers can lead to a false sense of  
509 security and missed opportunities to identify and mitigate changes in trophic status and  
510 associated risks such as toxin or taste and odor production, especially in sensitive,  
511 oligotrophic systems.

#### 512 **4. Conclusions**

- 513         ▪ The potential for diurnal migration should be reflected in cyanobacterial  
514 monitoring programs through the inclusion of multiple-sampling times or  
515 conducting sampling at an ecologically significant time of day.
- 516         ▪ Sampling of lakes should not be restricted to the surface and should include  
517 discrete sampling and multiple depths to reflect spatial heterogeneity of  
518 cyanobacterial communities present in the water column.

- 519       ▪ The positive buoyancy of cyanobacteria with gas vesicles may frequently be  
520           concentrated at the surface, but is not limited to this depth, with occurrence at  
521           deeper depths in the water column.
- 522       ▪ Rainfall or wind induced mixing events such as those observed in this  
523           investigation may significantly impact cyanobacterial community composition  
524           and distribution.
- 525       ▪ Cyanobacterial monitoring may be enhanced through the incorporation of system  
526           characteristics (e.g., thermal stratification) and characterization of communities  
527           for design of sampling protocols that are system specific.

## 528   **Acknowledgements**

529   We acknowledge the support of the *for*Water NSERC Network for Forested Drinking  
530   Water Source Protection Technologies [NETGP-494312-16]. We are also grateful for the  
531   continued support of Natural Resources Canada and Environment and Climate Change  
532   Canada in sample collection at Turkey Lakes Watershed Research Station.

533 **5. References**

- 534 Bisanz, J.E., 2018. qiime2R: Importing QIIME2 artifacts and associated data into R  
535 sessions. <https://github.com/jbisanz/qiime2R>.
- 536 Bolyen, E., Rideout, J.R., Dillon, M.R., Bokulich, N.A., Abnet, C.C., Al-Ghalith, G.A.,  
537 Alexander, H., Alm, E.J., Arumugam, M., Asnicar, F., Bai, Y., Bisanz, J.E.,  
538 Bittinger, K., Brejnrod, A., Brislawn, C.J., Brown, C.T., Callahan, B.J., Caraballo-  
539 Rodríguez, A.M., Chase, J., Cope, E.K., Da Silva, R., Diener, C., Dorrestein, P.C.,  
540 Douglas, G.M., Durall, D.M., Duvallet, C., Edwardson, C.F., Ernst, M., Estaki, M.,  
541 Fouquier, J., Gauglitz, J.M., Gibbons, S.M., Gibson, D.L., Gonzalez, A., Gorlick,  
542 K., Guo, J., Hillmann, B., Holmes, S., Holste, H., Huttenhower, C., Huttley, G.A.,  
543 Janssen, S., Jarmusch, A.K., Jiang, L., Kaehler, B.D., Kang, K. Bin, Keefe, C.R.,  
544 Keim, P., Kelley, S.T., Knights, D., Koester, I., Kosciulek, T., Kreps, J., Langille,  
545 M.G.I., Lee, J., Ley, R., Liu, Y.X., Loftfield, E., Lozupone, C., Maher, M., Marotz,  
546 C., Martin, B.D., McDonald, D., McIver, L.J., Melnik, A. V., Metcalf, J.L., Morgan,  
547 S.C., Morton, J.T., Naimey, A.T., Navas-Molina, J.A., Nothias, L.F., Orchanian,  
548 S.B., Pearson, T., Peoples, S.L., Petras, D., Preuss, M.L., Pruesse, E., Rasmussen,  
549 L.B., Rivers, A., Robeson, M.S., Rosenthal, P., Segata, N., Shaffer, M., Shiffer, A.,  
550 Sinha, R., Song, S.J., Spear, J.R., Swafford, A.D., Thompson, L.R., Torres, P.J.,  
551 Trinh, P., Tripathi, A., Turnbaugh, P.J., Ul-Hasan, S., van der Hooft, J.J.J., Vargas,  
552 F., Vázquez-Baeza, Y., Vogtmann, E., von Hippel, M., Walters, W., Wan, Y.,  
553 Wang, M., Warren, J., Weber, K.C., Williamson, C.H.D., Willis, A.D., Xu, Z.Z.,  
554 Zaneveld, J.R., Zhang, Y., Zhu, Q., Knight, R., Caporaso, J.G., 2019. Reproducible,

- 555 interactive, scalable and extensible microbiome data science using QIIME 2. *Nature*  
556 *Biotechnology* 37, 852–857. <https://doi.org/10.1038/s41587-019-0209-9>
- 557 Bray, J.R., Curtis, J.T., 1957. An Ordination of the Upland Forest Communities of  
558 Southern Wisconsin. *Ecological Monographs* 27, 325–349.  
559 <https://doi.org/10.2307/1942268>
- 560 Bukata, R.P., Jerome, J.H., Bruton, J.E., 1988. Relationships Among Secchi Disk Depth,  
561 Beam Attenuation Coefficient, and Irradiance Attenuation Coefficient for Great  
562 Lakes Waters. *Journal of Great Lakes Research* 14, 347–355.  
563 [https://doi.org/10.1016/S0380-1330\(88\)71564-6](https://doi.org/10.1016/S0380-1330(88)71564-6)
- 564 Callahan, B.J., McMurdie, P.J., Rosen, M.J., Han, A.W., Johnson, A.J.A., Holmes, S.P.,  
565 2016. DADA2: High-resolution sample inference from Illumina amplicon data.  
566 *Nature Methods* 13, 581–583. <https://doi.org/10.1038/nmeth.3869>
- 567 Cameron, E.S., Schmidt, P.J., Tremblay, B.J.M., Emelko, M.B., Müller, K.M., 2021.  
568 Enhancing diversity analysis by repeatedly rarefying next generation sequencing  
569 data describing microbial communities. *Scientific Reports* 11.  
570 <https://doi.org/10.1038/s41598-021-01636-1>
- 571 Cameron, E.S., Tremblay, B.J.-M., 2020. mirlyn: Multiple Iterations of Rarefying for  
572 Library Normalization. <https://github.com/escamero/mirlyn>.
- 573 Chapman, A.D., 2010. Cyanobacteria, in: *Algae Source to Treatment - Manual of Water*  
574 *Supply Practices M57*. American Water Works Association, pp. 125–146.

- 575 Chien, Y.C., Wu, S.C., Chen, W.C., Chou, C.C., 2013. Model simulation of diurnal  
576 vertical migration patterns of different-sized colonies of *Microcystis* employing a  
577 particle trajectory approach. *Environmental Engineering Science* 30, 179–186.  
578 <https://doi.org/10.1089/ees.2012.0318>
- 579 Chiu, Y.T., Chen, Y.H., Wang, T.S., Yen, H.K., Lin, T.F., 2017. A qPCR-based tool to  
580 diagnose the presence of harmful cyanobacteria and cyanotoxins in drinking water  
581 sources. *International Journal of Environmental Research and Public Health* 14.  
582 <https://doi.org/10.3390/ijerph14050547>
- 583 Chorus, I., Falconer, I.R., Salas, H.J., Bartram, J., 2000. Health risks caused by  
584 freshwater cyanobacteria in recreational waters. *Journal of Toxicology and*  
585 *Environmental Health - Part B: Critical Reviews* 3, 323–347.  
586 <https://doi.org/10.1080/109374000436364>
- 587 Chorus, Ingrid., Bartram, Jamie., 1999. *Toxic cyanobacteria in water : a guide to their*  
588 *public health consequences, monitoring, and management*. E & FN Spon.
- 589 Chu, Z., Jin, X., Yang, B., Zeng, Q., 2007. Buoyancy regulation of *Microcystis flos-*  
590 *aquae* during phosphorus-limited and nitrogen-limited growth. *Journal of Plankton*  
591 *Research* 29, 739–745. <https://doi.org/10.1093/plankt/fbm054>
- 592 Colorado Lake and Reservoir Management, 2015. *Guidance Document for Harmful*  
593 *Algal Blooms in Colorado*.
- 594



- 595 Emelko, M.B., Stone, M., Silins, U., Allin, D., Collins, A.L., Williams, C.H.S., Martens,  
596 A.M., Bladon, K.D., 2016. Sediment-phosphorus dynamics can shift aquatic ecology  
597 and cause downstream legacy effects after wildfire in large river systems. *Global*  
598 *Change Biology* 22, 1168–1184. <https://doi.org/10.1111/gcb.13073>
- 599 Filippini, M., Buesing, N., Gessner, M.O., 2008. Temporal dynamics of freshwater  
600 bacterio- and virioplankton along a littoral-pelagic gradient. *Freshwater Biology* 53,  
601 1114–1125. <https://doi.org/10.1111/j.1365-2427.2007.01886.x>
- 602 Frempong, E., 1981. Diel Variation in the Abundance, Vertical Distribution, and Species  
603 Composition of Phytoplankton in a Eutrophic English Lake. *The Journal of Ecology*  
604 69, 919. <https://doi.org/10.2307/2259645>
- 605 Ganf, G.G., 1974. Diurnal Mixing and the Vertical Distribution of Phytoplankton in a  
606 Shallow Equatorial Lake (Lake George, Uganda ). *Journal of Ecology* 62, 611–629.  
607 <https://doi.org/10.2307/2259002>
- 608 Gilbert, J.A., Field, D., Swift, P., Thomas, S., Cummings, D., Temperton, B., Weynberg,  
609 K., Huse, S., Hughes, M., Joint, I., Somerfield, P.J., Mühling, M., 2010. The  
610 taxonomic and functional diversity of microbes at a temperate coastal site: A “multi-  
611 omic” study of seasonal and diel temporal variation. *PLoS ONE* 5.  
612 <https://doi.org/10.1371/journal.pone.0015545>
- 613 Gloor, G.B., Macklaim, J.M., Pawlowsky-Glahn, V., Egozcue, J.J., 2017. Microbiome  
614 datasets are compositional: And this is not optional. *Frontiers in Microbiology* 8, 1–  
615 6. <https://doi.org/10.3389/fmicb.2017.02224>

- 616 Gloor, G.B., Macklaim, J.M., Vu, M., Fernandes, A.D., 2016. Compositional uncertainty  
617 should not be ignored in high-throughput sequencing data analysis. *Austrian Journal*  
618 *of Statistics* 45, 73–87. <https://doi.org/10.17713/ajs.v45i4.122>
- 619 Graham, J.L., Loftin, K.A., Ziegler, A.C., Meyer, M.T., 2008. Guidelines for design and  
620 sampling for cyanobacterial toxin and taste-and-odor studies in lakes and reservoirs,  
621 *Scientific Investigations Report* 2008-5038.
- 622 Guiry, M.D., Guiry, G.M., 2022. *AlgaeBase*, World-wide electronic publication, National  
623 University of Ireland, Galway. <https://www.algaebase.org>
- 624 Harke, M.J., Steffen, M.M., Gobler, C.J., Otten, T.G., Wilhelm, S.W., Wood, S.A., Paerl,  
625 H.W., 2016. A review of the global ecology, genomics, and biogeography of the  
626 toxic cyanobacterium, *Microcystis* spp. *Harmful Algae* 54, 4–20.  
627 <https://doi.org/10.1016/j.hal.2015.12.007>
- 628 Howard, A., 2001. Modeling Movement Patterns of the Cyanobacterium, *Microcystis*.  
629 *Ecological Applications* 11, 304–310. <https://doi.org/10.2307/3061075>
- 630 Huisman, J., Codd, G.A., Paerl, H.W., Ibelings, B.W., Verspagen, J.M.H., Visser, P.M.,  
631 2018. Cyanobacterial blooms. *Nature Reviews Microbiology* 16, 471–483.  
632 <https://doi.org/10.1038/s41579-018-0040-1>
- 633 Hunter, P.D., Tyler, A.N., Willby, N.J., Gilvear, D.J., 2008. The spatial dynamics of  
634 vertical migration by *Microcystis aeruginosa* in a eutrophic shallow lake: A case  
635 study using high spatial resolution time-series airborne remote sensing. *Limnology*  
636 *and Oceanography* 53, 2391–2406. <https://doi.org/10.4319/lo.2008.53.6.2391>

- 637 Ibelings, B.W., Mur, L.R., Walsby, A.E., 1991. Diurnal changes in buoyancy and vertical  
638 distribution in populations of *Microcystis* in two shallow lakes. Journal of Plankton  
639 Research 13, 419–436. <https://doi.org/10.1093/plankt/13.2.419>
- 640 Jeffries, D.S., Kelso, J.R.M., Morrison, I.K., 1988. Physical, Chemical and Biological  
641 Characteristics of the Turkey Lakes Watershed, Central Ontario, Canada. Canadian  
642 Journal of Fisheries and Aquatic Sciences 45, 3–13. <https://doi.org/10.1139/f88-262>
- 643 Klamath river blue green algae working group, 2009. Standard Operating Procedures  
644 Environmental Sampling of Cyanobacteria for Cell Enumeration , Identification and  
645 Toxin Analysis, Cyanobacteria Sampling SOP.
- 646 Kumar, S., Stecher, G., Li, M., Knyaz, C., Tamura, K., 2018. MEGA X: Molecular  
647 evolutionary genetics analysis across computing platforms. Molecular Biology and  
648 Evolution 35, 1547–1549. <https://doi.org/10.1093/molbev/msy096>
- 649 Legendre, P., Gallagher, E.D., 2001. Ecologically meaningful transformations for  
650 ordination of species data. Oecologia 129, 271–280.  
651 <https://doi.org/10.1007/s004420100716>
- 652 McMurdie, P.J., Holmes, S., 2012. Phyloseq: A bioconductor package for handling and  
653 analysis of high-throughput phylogenetic sequence data, Pacific Symposium on  
654 Biocomputing, 235-246.
- 655 Ministry for the Environment and Ministry of Health., 2009. New Zealand Guidelines for  
656 Cyanobacteria in Recreational Fresh Waters. Ministry for the Environment,  
657 Wellington.

- 658 Naselli-Flores, L., Zohary, T., Padisák, J., 2021. Life in suspension and its impact on  
659 phytoplankton morphology: an homage to Colin S. Reynolds. *Hydrobiologia* 848, 7–  
660 30. <https://doi.org/10.1007/s10750-020-04217-x>
- 661 Newcombe, G. (Ed.), 2009. International Guidance Manual for the Management of Toxic  
662 Cyanobacteria. Global Water Research Coalition.
- 663 Ohio Environmental Protection Agency, 2013. Inland Lakes Sampling Procedure  
664 Manual.
- 665 Olli, K., 1999. Diel vertical migration of phytoplankton and heterotrophic flagellates in  
666 the Gulf of Riga. *Journal of Marine Systems* 23, 145–163.  
667 [https://doi.org/10.1016/S0924-7963\(99\)00055-X](https://doi.org/10.1016/S0924-7963(99)00055-X)
- 668 Paerl, H.W., 2014. Mitigating harmful cyanobacterial blooms in a human- and  
669 climatically-impacted world. *Life* 4, 988–1012. <https://doi.org/10.3390/life4040988>
- 670 Patel, R., de Oliveira, A., Newby, R., Chu, T., 2019. Flow cytometric analysis of  
671 freshwater cyanobacteria: A case study. *Water (Switzerland)* 11.  
672 <https://doi.org/10.3390/w11071422>
- 673 Pobel, D., Robin, J., Humbert, J.F., 2011. Influence of sampling strategies on the  
674 monitoring of cyanobacteria in shallow lakes: Lessons from a case study in France.  
675 *Water Research* 45, 1005–1014. <https://doi.org/10.1016/j.watres.2010.10.011>
- 676 Quast, C., Pruesse, E., Yilmaz, P., Gerken, J., Schweer, T., Yarza, P., Peplies, J.,  
677 Glöckner, F.O., 2013. The SILVA ribosomal RNA gene database project: Improved

- 678 data processing and web-based tools. *Nucleic Acids Research* 41, 590–596.
- 679 <https://doi.org/10.1093/nar/gks1219>
- 680 R Core Team 2020. R: A language and environment for statistical computing. R  
681 Foundation for Statistical Computing, Vienna, Austria. URL: [https://www.R-](https://www.R-project.org/)  
682 [project.org/](https://www.R-project.org/) .
- 683 Reynolds, C.S., Oliver, R.L., Walsby, A.E., 1987. Cyanobacterial dominance: The role of  
684 buoyancy regulation in dynamic lake environments. *New Zealand Journal of Marine*  
685 *and Freshwater Research* 21, 379–390.
- 686 <https://doi.org/10.1080/00288330.1987.9516234>
- 687 Sarnelle, O., Morrison, J., Kaul, R., Horst, G., Wandell, H., Bednarz, R., 2010. Citizen  
688 monitoring: Testing hypotheses about the interactive influences of eutrophication  
689 and mussel invasion on a cyanobacterial toxin in lakes. *Water Research* 44, 141–  
690 150. <https://doi.org/10.1016/j.watres.2009.09.014>
- 691 Schmidt, P.J., Cameron, E.S., Müller, K.M., Emelko, M.B., 2022. Ensuring that  
692 fundamentals of quantitative microbiology are reflected in microbial diversity  
693 analyses based on next-generation sequencing. *Frontiers in Microbiology*.  
694 <https://doi.org/10.3389/fmicb.2022.728146>
- 695 Shahraki, A.H., Chaganti, S.R., Heath, D.D., 2020. Diel Dynamics of Freshwater  
696 Bacterial Communities at Beaches in Lake Erie and Lake St. Clair, Windsor,  
697 Ontario. *Microbial Ecology* 81, 1–13. <https://doi.org/10.1007/s00248-020-01539-0>
- 698 Shannon, C.E., 1948. A Mathematical Theory of Communication. *The Bell System*  
699 *Technical Journal* 27, 623–656. <https://doi.org/10.1002/j.1538-7305.1948.tb01338.x>

- 700 Silins, U., Bladon, K.D., Kelly, E.N., Esch, E., Spence, J.R., Stone, M., Emelko, M.B.,  
701 Boon, S., Wagner, M.J., Williams, C.H.S., Tichkowsky, I., 2014. Five-year legacy  
702 of wildfire and salvage logging impacts on nutrient runoff and aquatic plant,  
703 invertebrate, and fish productivity. *Ecohydrology* 7, 1508–1523.  
704 <https://doi.org/10.1002/eco.1474>
- 705 Śliwińska-Wilczewska, S., Maculewicz, J., Felpeto, A.B., Latała, A., 2018. Allelopathic  
706 and bloom-forming picocyanobacteria in a changing world. *Toxins* 10, 1–20.  
707 <https://doi.org/10.3390/toxins10010048>
- 708 Staley, J.T., 1980. The gas vacuole : an early organelle of prokaryote motility? *Origins of*  
709 *Life* 10, 111–116. <https://doi.org/10.1007/BF00928662>
- 710 Stoddard, J.L., van Sickle, J., Herlihy, A.T., Brahney, J., Paulsen, S., Peck, D. v.,  
711 Mitchell, R., Pollard, A.I., 2016. Continental-Scale Increase in Lake and Stream  
712 Phosphorus: Are Oligotrophic Systems Disappearing in the United States?  
713 *Environmental Science and Technology* 50, 3409–3415.  
714 <https://doi.org/10.1021/acs.est.5b05950>
- 715 University of New Hampshire - Center for Freshwater Biology, 2010. Standard Operating  
716 Procedure for Field Sampling of Cyanobacteria in Lakes.
- 717 Vidal, J., Rigosi, A., Hoyer, A., Escot, C., Rueda, F.J., 2014. Spatial distribution of  
718 phytoplankton cells in small elongated lakes subject to weak diurnal wind forcing.  
719 *Aquatic Sciences* 76, 83–99. <https://doi.org/10.1007/s00027-013-0316-5>
- 720 Vidal, L., Ballot, A., Azevedo, S.M.F.O., Padisák, J., Welker, M., 2021. Introduction to  
721 cyanobacteria, in: Chorus, I., Welker, M. (Eds.), *Toxic Cyanobacteria in Water - A*

- 722 Guide to Their Public Health Consequences, Monitoring and Management. CRC  
723 Press, pp. 163–211. <https://doi.org/10.1201/9781003081449-3>
- 724 Vieira, J.M.D.S., Azevedo, M.T.D.P., De Oliveira Azevedo, S.M.F., Honda, R.Y.,  
725 Corrêa, B., 2003. Microcystin production by *Radiocystis fernandoi* (Chroococcales,  
726 Cyanobacteria) isolated from a drinking water reservoir in the city of Belém, PA,  
727 Brazilian Amazonia region. *Toxicon* 42, 709–713.  
728 <https://doi.org/10.1016/j.toxicon.2003.08.004>
- 729 von Orgies-Rutenberg, M., Rolfes, C., Eckel, T., Quiroz, A., Skalbeck, J., Riley, D.,  
730 Sander, H., 2018. Diurnal vertical migration of cyanobacteria and chlorophyta in  
731 eutrophied shallow freshwater lakes. *Fundamental and Applied Limnology* 191.  
732 <https://doi.org/10.1127/fal/2017/1021>
- 733 Vu, H.P., Nguyen, L.N., Zdarta, J., Nga, T.T.V., Nghiem, L.D., 2020. Blue-Green Algae  
734 in Surface Water: Problems and Opportunities. *Current Pollution Reports* 6, 105–  
735 122. <https://doi.org/10.1007/s40726-020-00140-w>
- 736 Walsby, A.E., Hayes, P.K., Boje, R., Stal, L.J., 1997. The selective advantage of  
737 buoyancy provided by gas vesicles for planktonic cyanobacteria in the Baltic Sea.  
738 *New Phytologist* 136, 407–417. <https://doi.org/10.1046/j.1469-8137.1997.00754.x>
- 739 Walsby, A.E., 1981. Cyanobacteria: Planktonic Gas-Vacuolate Forms, in: Starr, M.P.,  
740 Stolp, H., Trüper, H.G., Balows, A., Schlegel, H.G. (Eds.), *The Prokaryotes: A*  
741 *Handbook on Habitats, Isolation, and Identification of Bacteria*. Springer Berlin  
742 Heidelberg, Berlin, Heidelberg, pp. 224–235. [https://doi.org/10.1007/978-3-662-](https://doi.org/10.1007/978-3-662-13187-9_10)  
743 [13187-9\\_10](https://doi.org/10.1007/978-3-662-13187-9_10)

744 Walters, W., Hyde, E.R., Berg-Lyons, D., Ackermann, G., Humphrey, G., Parada, A.,  
745 Gilbert, J.A., Jansson, J.K., Caporaso, J.G., Fuhrman, J.A., Apprill, A., Knight, R.,  
746 2015. Improved Bacterial 16S rRNA Gene (V4 and V4-5) and Fungal Internal  
747 Transcribed Spacer Marker Gene Primers for Microbial Community Surveys.  
748 *mSystems* 1, e0009-15. <https://doi.org/10.1128/mSystems.00009-15.Editor>

749 Water Quality Research Australia, Global Water Research Coalition, 2009. International  
750 Guidance Manual for the Management of Toxic Cyanobacteria.

751 Westwood, K.J., Ganf, G.G., 2004. Effect of mixing patterns and light dose on growth of  
752 *Anabaena circinalis* in a turbid, lowland river. *River Research and Applications* 20,  
753 115–126. <https://doi.org/10.1002/rra.725>

754 Xiao, Y., Gan, N., Liu, J., Zheng, L., Song, L., 2012. Heterogeneity of buoyancy in  
755 response to light between two buoyant types of cyanobacterium *Microcystis*.  
756 *Hydrobiologia* 679, 297–311. <https://doi.org/10.1007/s10750-011-0894-y>

757 Yamamoto, Y., Nakahara, H., 2006. Seasonal variations in the diel vertical distribution of  
758 phytoplankton and zooplankton in a shallow pond. *Phycological Research* 54, 280–  
759 293. <https://doi.org/10.1111/j.1440-1835.2006.00435.x>

760 Yilmaz, P., Parfrey, L.W., Yarza, P., Gerken, J., Pruesse, E., Quast, C., Schweer, T.,  
761 Peplies, J., Ludwig, W., Glöckner, F.O., 2014. The SILVA and “all-species Living  
762 Tree Project (LTP)” taxonomic frameworks. *Nucleic Acids Research* 42, D643–  
763 D648. <https://doi.org/10.1093/nar/gkt1209>

764
